# Supplementary material for: High-resolution Holocene record based on detailed tephrochronology from Torfdalsvatn, north Iceland, reveals natural and anthropogenic impacts on terrestrial and aquatic environments
Source: Copernicus journal article supplement (doi:10.5194/cp-21-795-2025), 2025-04-11
Supplement: Supplementary file 1 [file cp-21-795-2025-supplement.zip]

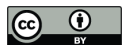

*Supplement of*

**High-resolution Holocene record based on detailed tephrochronology from Torfdalsvatn, north Iceland, reveals natural and anthropogenic impacts on terrestrial and aquatic environments**

**David J. Harning et al.**

*Correspondence to:* David J. Harning (david.harning@colorado.edu)

- cp-21-795-2025-supplement-title-page.pdf
- Supporting\_Information
  - Harning\_etal\_Supporting\_Data.xlsx
  - Harning\_etal\_Torfdalsvatn\_SI\_revised2.pdf

The copyright of individual parts of the supplement might differ from the article licence.
